# Supplementary material for: Dye colour switching by hydride-terminated silicon particles and its application as an oxygen indicator
Source: Royal Society of Chemistry journal article supplement (doi:10.1039/c6tc00749j), 2016-01-01
Supplement: c6tc00749j1.pdf [file c6tc00749j1.pdf]

## Supporting Information

### **Dye colour switching by hydride-terminated silicon nanoparticles and its application as an oxygen indicator**

Miaomiao Ye,<sup>\*abc</sup> Chenxi Qian,<sup>b</sup> Wei Sun,<sup>b</sup> Le He,<sup>b</sup> Jia Jia,<sup>b</sup> Yuchan Dong,<sup>b</sup> and Wenjie Zhou<sup>b</sup>

<sup>b</sup> State key of Urban Water Resource and Environment, Harbin Institute of Technology, Harbin, 150090, P R China.

<sup>a</sup> Zhejiang Key Laboratory of Drinking Water Safety and Distribution Technology, Zhejiang University, Hangzhou, 310058, P R China

<sup>b</sup> Department of Chemistry, University of Toronto, Toronto, Ontario M5S 3H6, Canada Email: gozin@chem.utoronto.ca; Tel.: +01 416 978 2082

<sup>c</sup> State key of Urban Water Resource and Environment, Harbin Institute of Technology, Harbin, 150090, P R China.

\*Email address: yemiao008@zju.edu.cn; Tel.: +86 571 88206759

## Figures

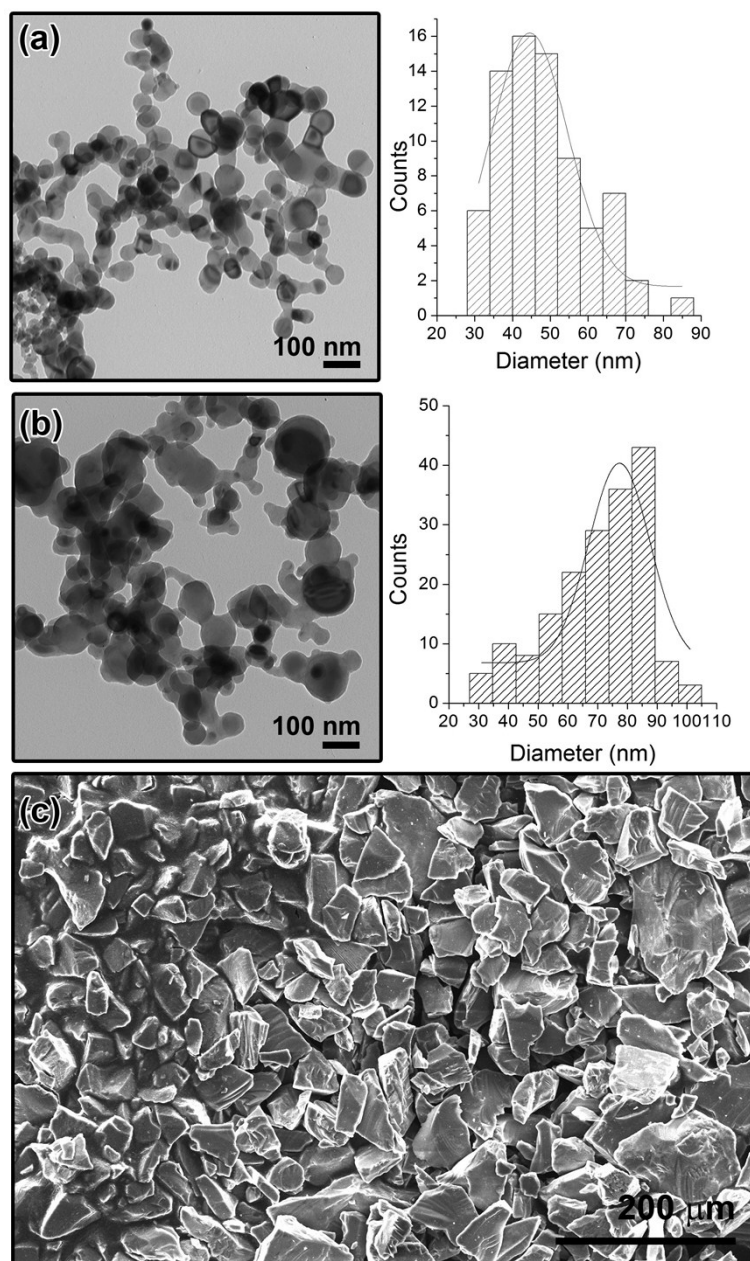

**Fig. S1** SEM and TEM images of the hydride-terminated silicon nanoparticles with different sizes. The particle size distributions were calculated by counting more than 80 nanoparticles from TEM and SEM images, which were of (a)  $\sim 50$  nm, (b)  $\sim 80$  nm, (c)  $\sim 44\mu\text{m}$ , and denoted as Si:H-50nm, Si:H-80nm, and Si:H-44 $\mu\text{m}$ , respectively.

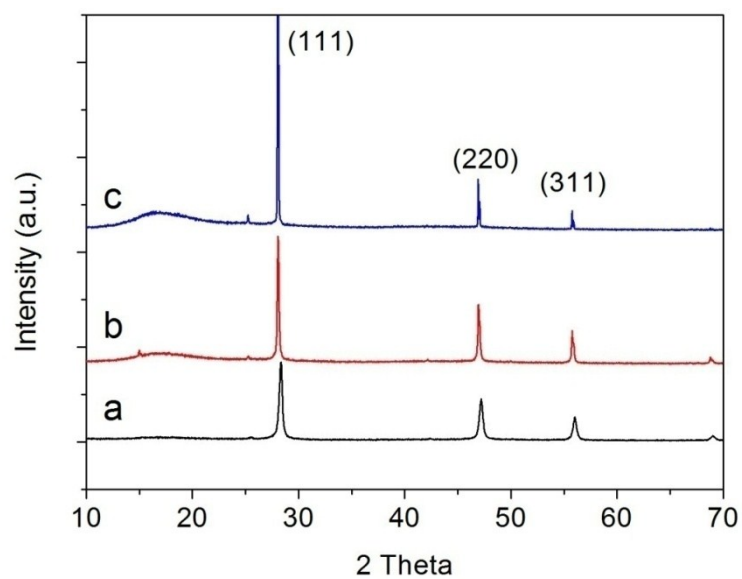

**Fig. S2** PXRD patterns of the (a) Si:H-50nm, (b) Si:H-80nm, and (c) Si:H-44 $\mu$ m.

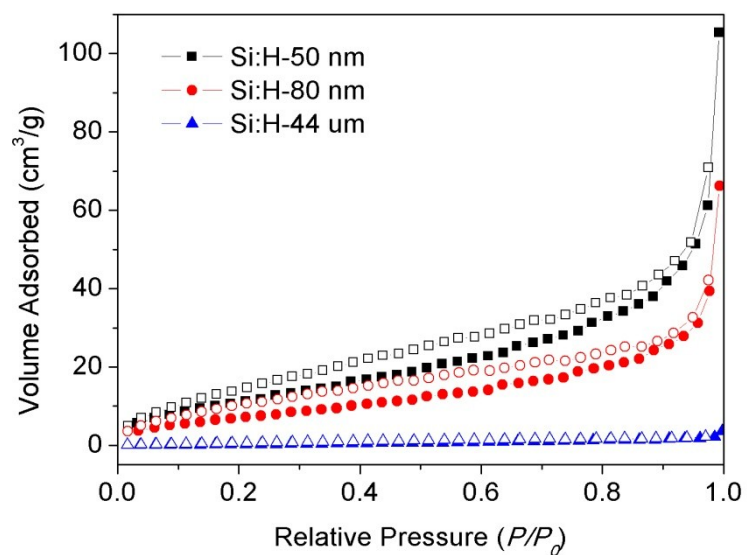

**Fig. S3** Nitrogen adsorption-desorption isotherms of the Si:H-50nm, Si:H-80nm, and Si:H-44 $\mu$ m.

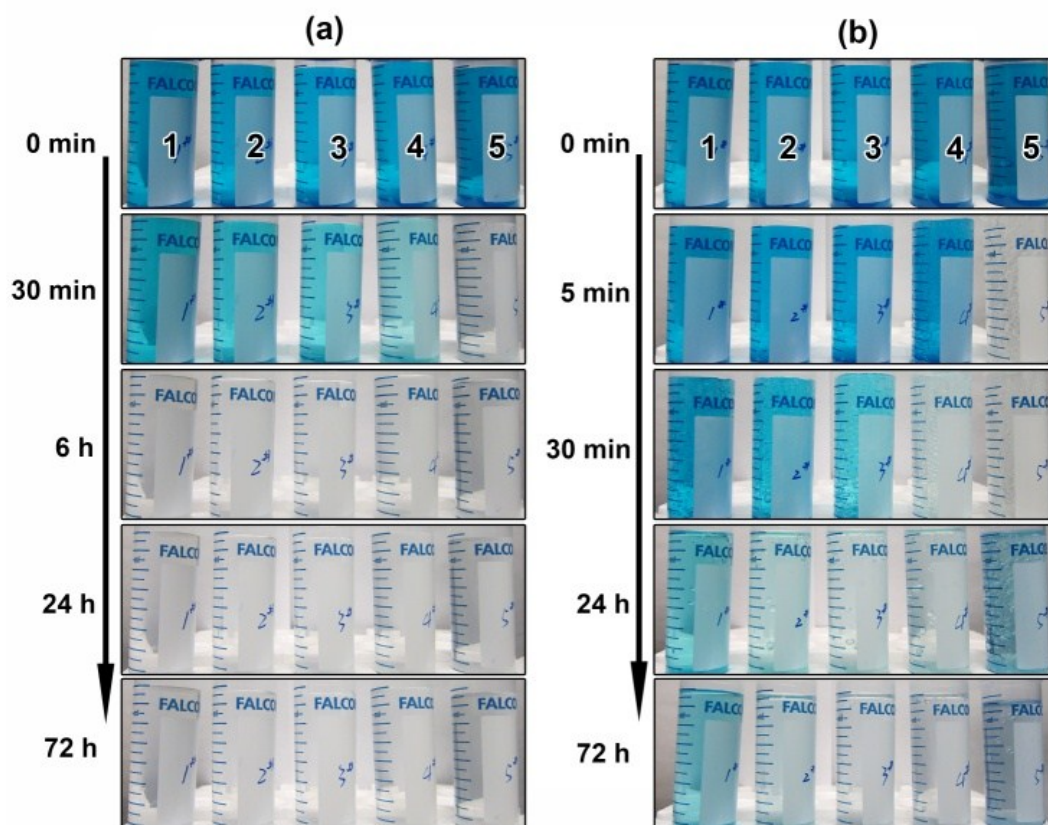

**Fig. S4** Reduction and reoxidation of MB by (a)  $\text{Na}_2\text{SO}_3$  and (b)  $\text{NaBH}_4$  with different dosage of (1) 40 mg, (2) 80 mg, (3) 160 mg, (4) 320 mg, and (5) 1280 mg, respectively.

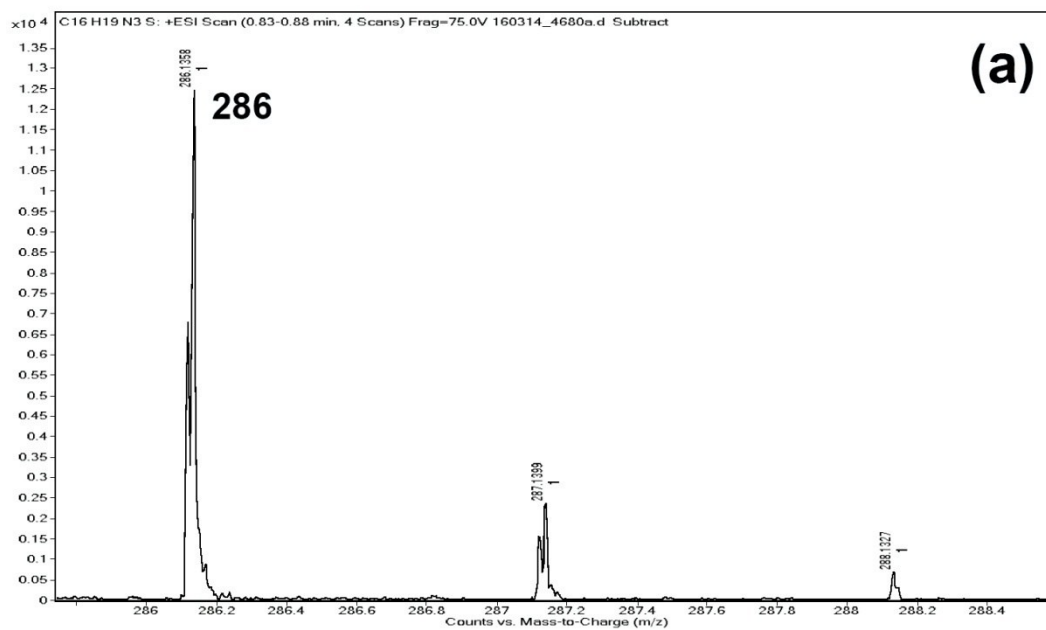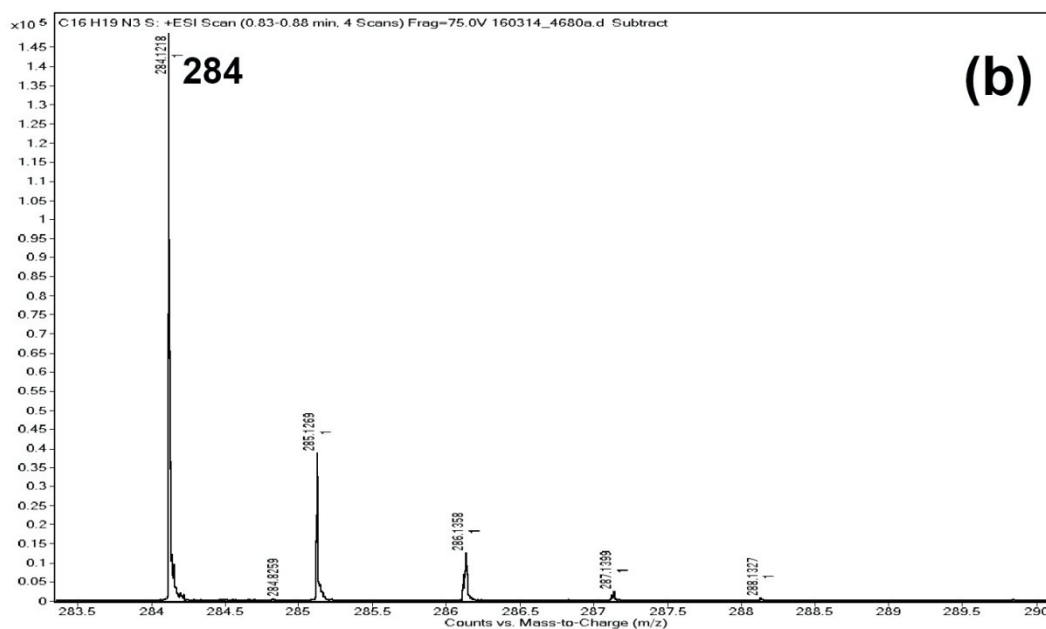

**Fig. S5** MS spectra of (a) LMB and (b) MB during the MB reduction process by Si:H-50nm.

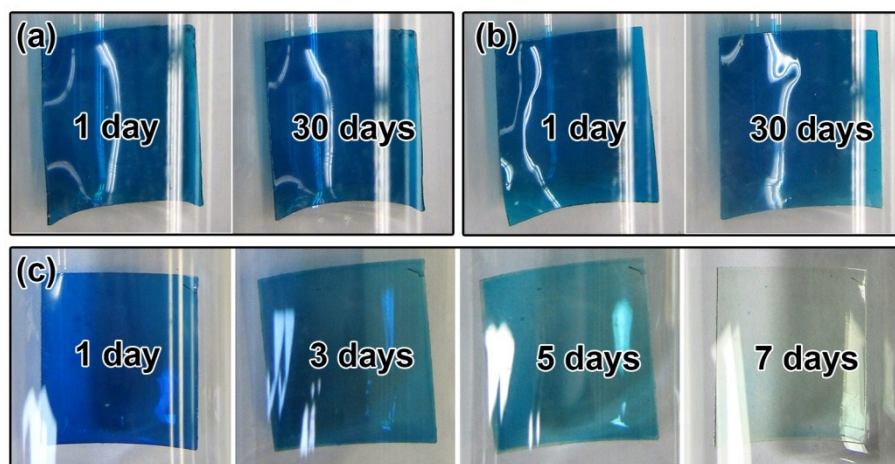

**Fig. S6** The oxygen indicator film expose to air and store in (a) dark, (b) fluorescent light and (c) sun light, respectively.

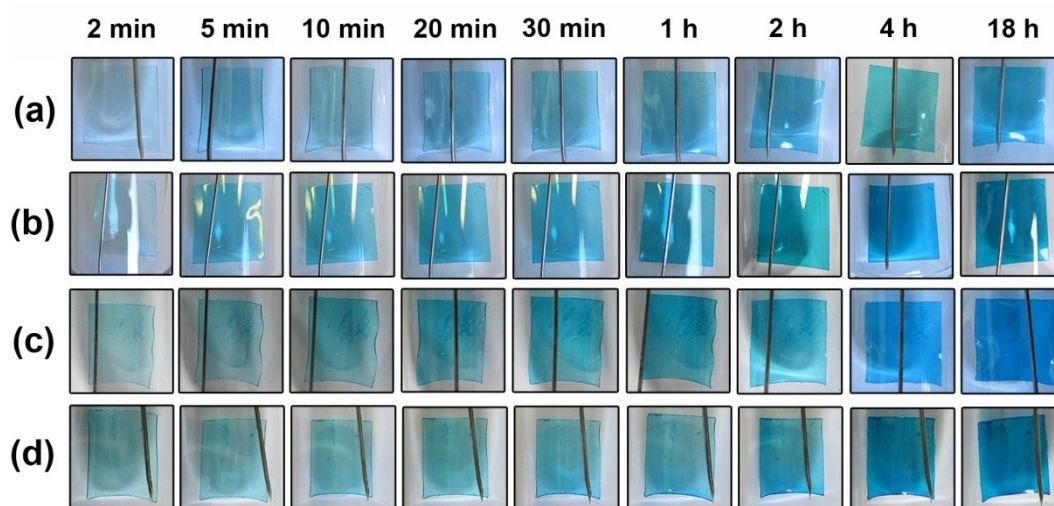

**Fig. S7** Digital photos of the oxygen indicator film store in different oxygen-carbon dioxide flow ratios of (a) 1:50, (b) 1:15, (c) 1:4, and (d) 9:1, respectively.
